# Supplementary material for: Pembrolizumab-Associated Nerve Epidermal Growth Factor-Like 1 Membranous Nephropathy
Source: PubMed Central journal article supplement — Kidney Int Rep. 2022 Dec 30;8(3):676–9. doi: 10.1016/j.ekir.2022.12.018 (PMC10014370; doi:10.1016/j.ekir.2022.12.018), 2022-12-30
Supplement: mmc1.pdf [file mmc1.pdf]

## Supplementary Material

**Supplementary Table:** Summary of published reports of membranous nephropathy associated with immune checkpoint inhibitor therapy.

| Reference                        | Age, years | Sex | Cancer site                           | CPIs received | Baseline Scr (mg/dl) | Urine protein-creatinine ratio | ANCA serology                      | Therapy                                          |
|----------------------------------|------------|-----|---------------------------------------|---------------|----------------------|--------------------------------|------------------------------------|--------------------------------------------------|
| <b>Bonilla M et al. (S1)</b>     | 88         | M   | Squamous cell cancer of head and neck | Cemiplimab    | 2.2                  | 11.9                           | PLA2R Ab positive                  | Oral corticosteroids and discontinuation of CPIs |
| <b>Wakabayashi K et al. (S2)</b> | 69         | M   | Lung adenocarcinoma stage 4           | Nivolumab     | 1.02                 | 19                             | PLA2R Ab negative                  | Oral corticosteroids and discontinuation of CPIs |
| <b>Chen M et al. (S3)</b>        | 74         | M   | Metastatic lung adenocarcinoma        | Tislelizumab  | 0.9                  | NA                             | THSD7A positive, PLA2R Ab negative | Oral corticosteroids and discontinuation of CPIs |

### Supplemental references:

- S1. Bonilla M, Maturostrakul B, Khan N, Bijol V, Jhaveri KD, Wanchoo R. Phospholipase A2 receptor antibody mediated membranous nephropathy associated with cemiplimab. *Journal of Onco-Nephrology*. 2021;5(1):27-30. doi:10.1177/23993693211004612
- S2. Wakabayashi K, Yamamoto S, Hara S, Okawara M, Teramoto K, Ikeda N, Kusunoki Y, Takeji M. Nivolumab-induced membranous nephropathy in a patient with stage IV lung adenocarcinoma. *CEN Case Rep*. 2022 May;11(2):171-176. doi: 10.1007/s13730-021-00645-3. Epub 2021 Sep 15. PMID: 34524642; PMCID: PMC9061917.
- S3. Chen M, Zhang L, Zhong W, Zheng K, Ye W, Wang M. Case report: THSD7A-positive membranous nephropathy caused by tislelizumab in a lung cancer patient. *Frontiers in Immunology*. 2021 May 10;12:619147.
- S4. Caza TN, Hassen SI, Dvanajscak Z, Kuperman M, Edmondson R, Herzog C, Storey A, Arthur J, Cossey LN, Sharma SG, Kenan DJ. NELL1 is a target antigen in malignancy-associated membranous nephropathy. *Kidney international*. 2021 Apr 1;99(4):967-76
- S5. Sethi S, Debiec H, Madden B, Charlesworth MC, Morelle J, Gross L, Ravindran A, Buob D, Jadoul M, Fervenza FC, Ronco P. Neural epidermal growth factor-like 1 protein (NELL-1) associated membranous nephropathy. *Kidney Int*. 2020 Jan;97(1):163-174.
- S6. Kurien AA, Prema KJ, Walker P, Caza T. Traditional indigenous medicines are an etiologic consideration for NELL1-positive membranous nephropathy. *Kidney International*. 2022 Sep 9.
- S7. Stokes MB, Foster K, Markowitz GS, Ebrahimi F, Hines W, Kaufman D, et al. Development of glomerulonephritis during anti-TNF-alpha therapy for rheumatoid arthritis. *Nephrol Dial Transplant*. (2005) 20:1400–6. doi: 10.1093/ndt/gfh832
- S8. Katz WA, Blodgett RC Jr, Pietrusko RG. Proteinuria in gold-treated rheumatoid arthritis. *Ann Intern Med* 1984; 101:176.
- S9. Sethi S. The Many Faces of NELL1 MN, *Clin Kid J*, 2022; sfac237 <https://doi.org/10.1093/ckj/sfac237>
